# Supplementary material for: Optimized Spectrophotometry Method for Starch Quantification
Source: MDPI journal article supplement (doi:10.3390/analytica3040027), 2022-10-26
Supplement: s1 [file s1]

# Optimized Spectrophotometry Method for Starch Quantification

Palina Bahdanovich <sup>1,2</sup>, Kevin Axelrod <sup>1,2</sup>, Andrey Khlystov <sup>1</sup>, and Vera Samburova<sup>1,\*</sup>

<sup>1</sup> Division of Atmospheric Sciences, Desert Research Institute, Reno, NV 89512, USA

<sup>2</sup> Department of Physics, University of Nevada, Reno, Reno, NV 89557, USA

\*Correspondence: vera.samburova@dri.edu

**Table S1.** Calibration levels used for calibration curve of starch content.

| Calibration level | Calibration concentration (µg/mL) | Volume added (mL) | Dilution from stock solution (1000 µg/mL) |
|-------------------|-----------------------------------|-------------------|-------------------------------------------|
| 1                 | 1                                 | 0.01              | 1000x                                     |
| 2                 | 10                                | 0.1               | 100x                                      |
| 3                 | 25                                | 0.25              | 40x                                       |
| 4                 | 50                                | 0.5               | 20x                                       |
| 5                 | 75                                | 0.75              | 13.3x                                     |
| 6                 | 100                               | 1.0               | 10x                                       |

**Table S2.** Concentration of starch in bioaerosols (µg starch/mg dry weight) at 590 nm.

| Bioaerosol type                                | Fresh concentration (µg starch/mg dry weight) | Heated concentration (µg starch/mg dry weight) |
|------------------------------------------------|-----------------------------------------------|------------------------------------------------|
| Pollen<br>( <i>Pinus Contorta</i> )            | 0.52 ± 0.03                                   | 0.94 ± 0.06                                    |
| Fungi<br>( <i>Endocronartium Harknessii</i> )  | 3.51 ± 0.03                                   | 4.31 ± 0.06                                    |
| Bacteria<br>( <i>Bacillus subtilis</i> )       | 0.45 ± 0.03                                   | 0.45 ± 0.05                                    |
| Microalgae<br>( <i>Arthrospira Platensis</i> ) | 0.69 ± 0.02                                   | 0.64 ± 0.05                                    |

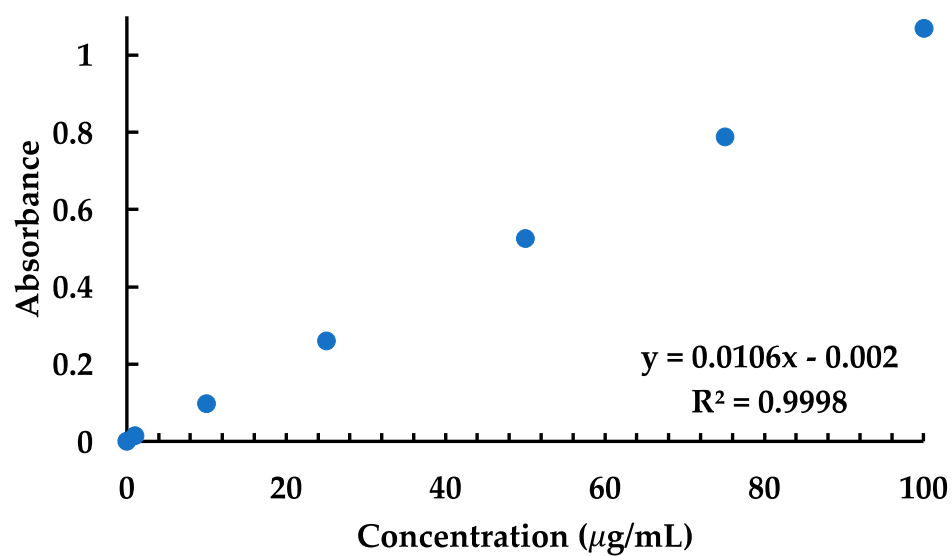

**Figure S1.** Calibration curve at 0.2% iodine reagent concentration (see table S1 for concentrations of calibration levels).

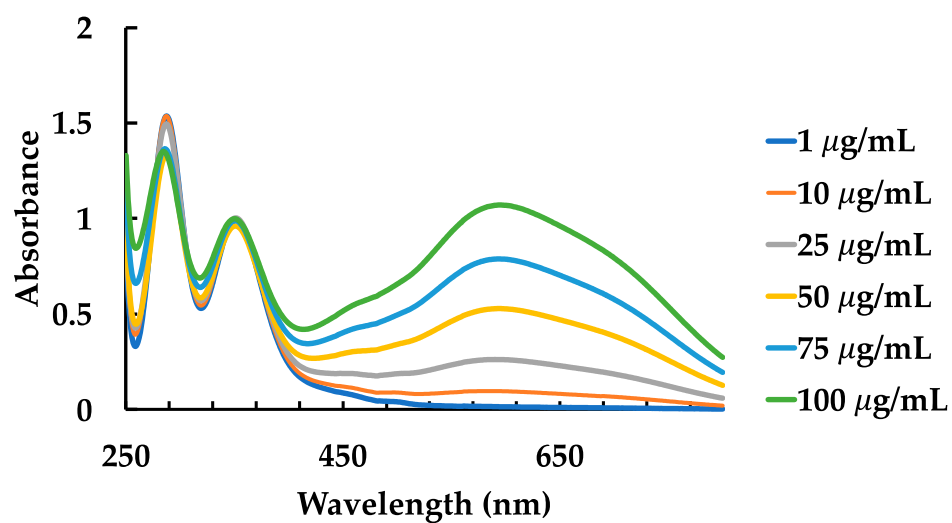

**Figure S2.** Spectra of calibration levels at 0.2% iodine reagent concentration.

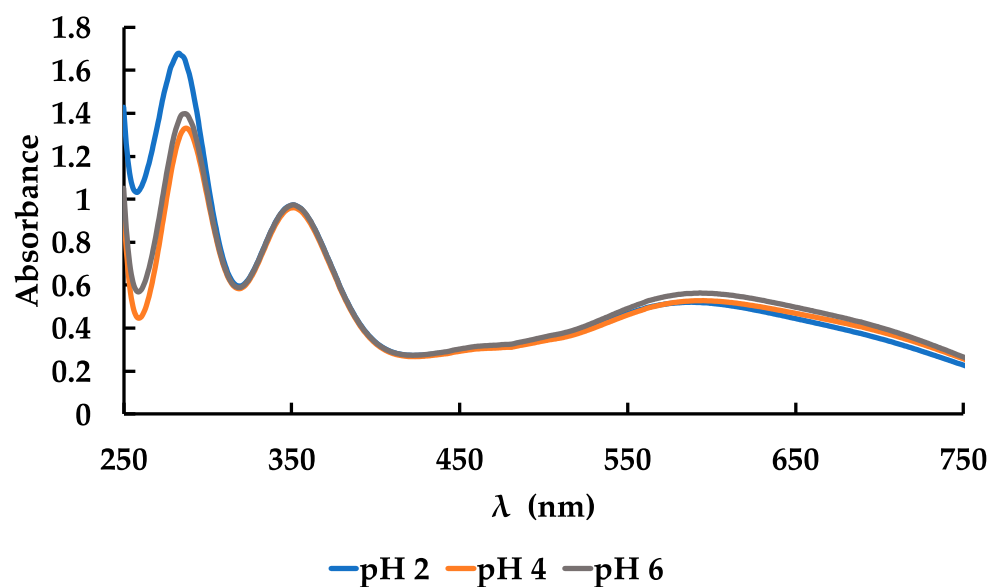

Figure S3. Full spectrum of calibration level 4 (50 µg/mL) at pH 2,4, and 6.

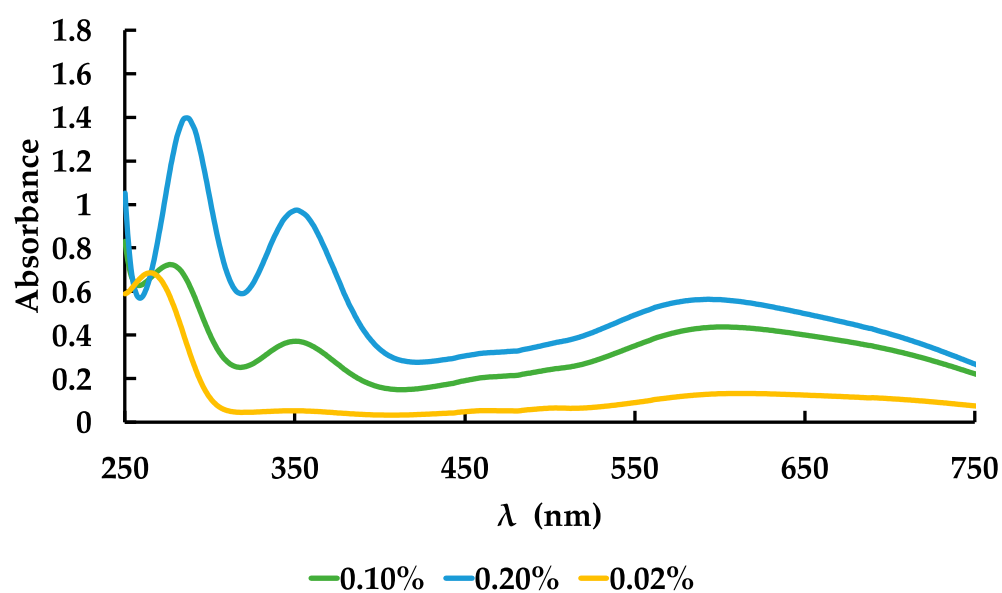

Figure S4. Full spectrum of calibration level 4 (50 µg/mL) at iodine reagent concentration 0.02, 0.1, and 0.2%.
